1 The Genotype Diversity within the H5N8 Influenza A  
2 Subtype.

3 **Andrew Dalby** <sup>1,\*</sup>, **Lorna Tinworth** <sup>1</sup> and **Munir Iqbal** <sup>2</sup>

4 <sup>1</sup> Department of Life Sciences, University of Westminster, 115 New Cavendish Street,  
5 Westminster, W1W 6UW, UK; [A.Dalby@westminster.ac.uk](mailto:A.Dalby@westminster.ac.uk)

6 <sup>2</sup> The Pirbright Institute, Pirbright, Woking, Surrey, GU24 0NF, UK.;  
7 [munir.iqbal@pirbright.ac.uk](mailto:munir.iqbal@pirbright.ac.uk)

8 \* Correspondence: [A.Dalby@westminster.ac.uk](mailto:A.Dalby@westminster.ac.uk); Tel.: +44-207-915-5511

## 10 Abstract

11 The H5N8 influenza subtype has been involved in the global spread of the Guangdong  
12 variant of the H5 hemagglutinin. The sequence data from all of the complete genomes  
13 from the H5N8 subtype was used to analyse the genotype diversity. Clustering analysis  
14 was used to assign lineages to each of the segments where different lineages were  
15 present. The results show that there have been multiple reassortment events both within  
16 the Guangdong and non-Guangdong H5 hemagglutinin containing variants. The  
17 Guangdong H5 variants can be subdivided further into two sub-lineages 2.3.4.4.A and  
18 2.3.4.4.B that have undergone reassortment in both the far east and the United States.

19 **Keywords:** influenza; H5N8; reassortment, genotype.

## 21 Introduction

22 The H5N8 influenza subtype is of considerable interest because of its potential global  
23 impact in spreading the Guangdong variant of the H5 hemagglutinin[1].

24

25 The highly pathogenic avian influenza virus (HPAIV) H5 hemagglutinin originated in a  
26 goose in Guangdong in 1996 [2]. This lineage has subsequently been classified into  
27 subgroups/clades by the World Health Organisation [3,4]. This H5-HPAIV nomenclature  
28 can be used to examine the diversity of the viral proteins in the H5N8 subtype.

29

30 Previously the HPAIV H5 Guangdong lineage had been limited to Asia but the 2014 H5N8  
31 outbreak in Korea was spread through wild bird migration to Western Europe and North  
32 America [5–9]. The H5N8 subtype was spread via long range bird migration [10,11]. In  
33 North America there was a rapid reassortment that produced the H5N2 subtype which then  
34 spread across the US during 2015 [12,13]. Since the winter 2014/2015 European outbreak  
35 there have been several subsequent introductions of new isolates that originated in Asia  
36 [7,14–16].

37

38 Clade 2.3.4.4 of H5N8 subtype can be broken down into at least two distinct groups, clade  
39 2.3.4.4.A and 2.3.4.4.B. These were first identified during the 2014 South Korean  
40 outbreak. Previously, these were identified as the Buan (A) and Gochang (B) clades  
41 [17,18].

42

43 Pairwise distance methods can be used in order to calculate the diversity of the nucleotide  
44 or protein sequences and in order to cluster the sequences into groups [19]. Where there is  
45 considerable diversity and where the functional properties of the gene are being analysed  
46 it makes more sense to use the protein sequence rather than the nucleotide sequence.

47

48 Within the sequence alignments there are patterns of conserved and variable amino acids  
49 that can be used to define sub-groups for the different proteins. These sub-groups can be  
50 identified rapidly by carrying out cluster analysis using the matrix of pairwise distances  
51 between sequences [20]. For the H5 hemagglutinin protein these sub-groups can be  
52 checked against the existing WHO H5 sub-clade nomenclature [3]. For the other viral  
53 proteins there is no currently available classification but it is possible to measure the within  
54 group diversity of the clusters to show that the clustering is reliable.

55

56 The clusters specify the different lineages and sub-lineages and we can use these to  
57 assign a genotype to the particular H5N8 virus.

58 .

## 60 Materials and Methods

61 The complete set of H5N8 protein sequences for all of the viral proteins were downloaded  
62 from the Influenza Research Database [21]. These sequences were downloaded as  
63 FASTA files with a customized header that included;

64

65 Accession

66 Protein

67 Subtype

68 Date

69 Country

70 Host

71 H5 Clade

72 Strain

73

74 Only complete length sequences were used.

75

76 Sequences were aligned using Muscle within Mega 7.0.26 [22,23]. The alignment was then  
77 visually checked for missing amino acids and for truncated sequences. Any sequences  
78 that were not full length were removed, as were any sequences which contained a large  
79 number of unassigned amino acids. A summary of the dataset used in the analysis is given  
80 in table 1.

81

82 Table One: Summary of the dataset used for analysis.

83

| Protein             | HA  | M1  | M2  | NA  | NP  | NS1 | NS2 | PA  | PB1 | PB2 |
|---------------------|-----|-----|-----|-----|-----|-----|-----|-----|-----|-----|
| Number of Sequences | 236 | 219 | 205 | 218 | 216 | 199 | 207 | 217 | 205 | 216 |

84

85 Pairwise sequence distances were calculated within Mega from the final set of aligned  
86 sequences. Distances were calculated using the Poisson correction model within Mega7.

87 Distances are given as the number of amino acid substitutions per site. Excel was used to  
88 calculate the mean and maximum pairwise sequence distances for each protein.

89

90 Mega produces only the triangular matrix of the pairwise distances. In order to create a  
91 complete distance matrix the matrix was imported into R, after removing the sequence  
92 names to a separate file in Excel, and the complete matrix generated [24]. From the  
93 complete distance matrix a k-means clustering analysis was carried out in R, by firstly  
94 finding the number of clusters present in the data. This was determined by calculating the  
95 within group sum of the square distances for 2-14 clusters and finding where this falls to a  
96 minimum and then levels off. The k-means clustering can then be carried out for the  
97 optimum number of clusters and the clustering can be used to annotate the pairwise distance  
98 matrix. The R-scripts used to carry out the analysis are available as supplementary  
99 materials (script files S1-S10). Finally the names of the sequences were added back to the  
100 data analysis within Excel.

101

102 The genotypes for H5N8 strains were assigned manually based on the clustering. Each  
103 genotype corresponds to a unique combination of cluster numbers for the different  
104 segments. Where there are segments missing these are provisionally assigned to a  
105 distinct genotype dependent on the other cluster numbers being distinctive.

106

## 108 Results

109 The maximum, mean, median and variance in the amino acid distances between  
110 sequences are given in table 2.

111

112 Table 2: The summary statistics for the percentage pairwise distances between the  
113 sequences for each protein.

114

| Protein  | HA     | M1    | M2     | NA     | NP    | NS1    | NS2    | PA    | PB1   | PB2   |
|----------|--------|-------|--------|--------|-------|--------|--------|-------|-------|-------|
| Maximum  | 16.40% | 7.00% | 14.40% | 19.00% | 4.30% | 44.60% | 25.20% | 4.90% | 3.40% | 4.60% |
| Median   | 2.40%  | 1.20% | 1.00%  | 1.90%  | 0.60% | 1.30%  | 2.50%  | 1.60% | 1.30% | 1.20% |
| Average  | 3.36%  | 1.72% | 3.00%  | 3.11%  | 0.70% | 5.05%  | 4.00%  | 1.67% | 1.19% | 1.48% |
| Variance | 0.16%  | 0.04% | 0.12%  | 0.17%  | 0.00% | 0.64%  | 0.20%  | 0.02% | 0.01% | 0.02% |

115

116 HA (hemagglutinin), NA (neuraminidase), M1 (matrix-1), M2 (matrix-1), NP (nucleoporin),  
117 NS1 (nonstructural-1), NS2 (nonstructural-2), PA (polymerase acidic), PB1 (polymerase  
118 basic-1) PB2 (polymerase basic-2).

119

120 The number of clusters identified for each protein are given in table 3.

121

122 Table 3: The number of clusters for each of the proteins.

123

| Protein            | HA | M1 | M2 | NA | NP | NS1 | NS2 | PA | PB1 | PB2 |
|--------------------|----|----|----|----|----|-----|-----|----|-----|-----|
| Number of Clusters | 3  | 3  | 3  | 6  | 1  | 3   | 7   | 3  | 2   | 2   |

124

125 HA (hemagglutinin), NA (neuraminidase), M1 (matrix-1), M2 (matrix-1), NP (nucleoporin),  
126 NS1 (nonstructural-1), NS2 (nonstructural-2), PA (polymerase acidic), PB1 (polymerase  
127 basic-1) PB2 (polymerase basic-2).

128

129 The plots of the within group sum of the squares against the number of clusters are shown  
130 for the hemagglutinin (HA), neuraminidase(NA) and nucleoporin (NP) proteins in figures 1-  
131 3 respectively.

132

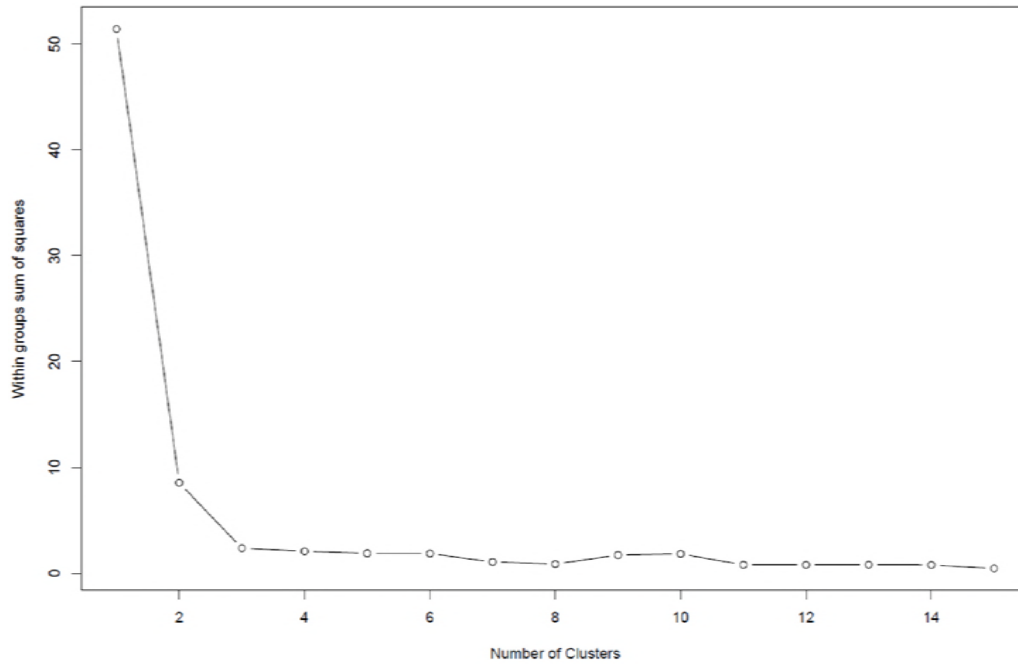

133

134 Figure 1: The within group sum of the squares for the hemagglutinin protein.

135

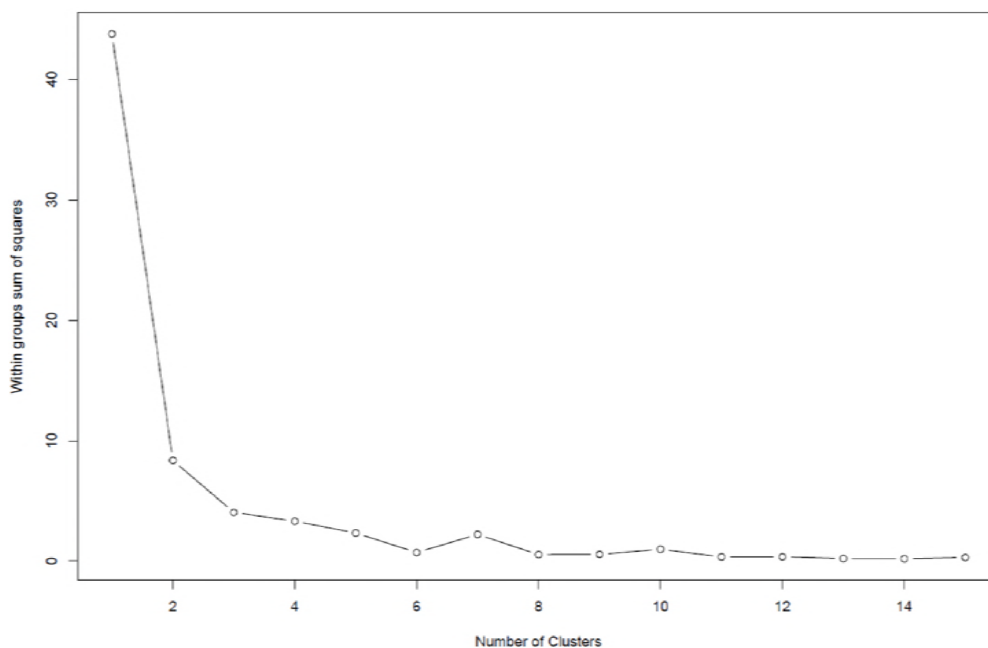

136



137 Figure 2: The within group sum of the squares for the neuraminidase protein.

138

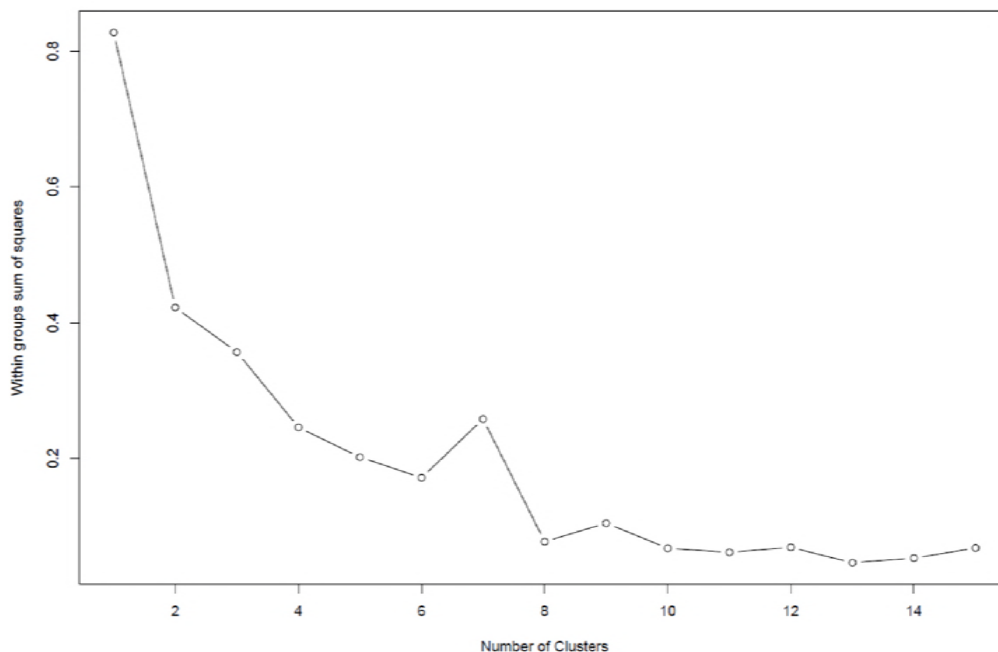

139

140 Figure 3: The within group sum of the squares for the nucleoprotein protein.

141

142 The plots of within group sums of the squares for the other proteins can be found in  
143 supplementary materials figures S11-S17

144

145 The cluster numbers were assigned to the sequences for each of the different segments.  
146 These clusters represent different lineages of the viral protein segments. From cluster  
147 assignment the unique genotypes were determined. Each genotype represents a different  
148 combination of clusters (lineages) for the different viral protein segments.

149

150 The 31 complete or almost complete genotypes are shown in Table 4 along with their  
151 representative strains. Representative strains are the first occurrences of that specific  
152 combination of viral protein segment lineages.

153

155 Table 4: The unique H5N8 genotypes.

| Strain Name                              | H5 Clade       | HA | M1 | M2 | NA | NS 1 | NS 2 | PA | PB 1 | PB 2 |
|------------------------------------------|----------------|----|----|----|----|------|------|----|------|------|
| A/Baikal_tea/Korea/H62/2014              | 2.3.4.4        | 1  | 2  | NA | 6  | 1    | 4    | 2  | 2    | 1    |
| A/goose/Taiwan/01003/2015                | 2.3.4.4        | 1  | 3  | 1  | 4  | 1    | 4    | 2  | 1    | 1    |
| A/duck/Taiwan/A3400/2015                 | 2.3.4.4        | 1  | 3  | 1  | 4  | 2    | 3    | 2  | 1    | 2    |
| A/environment/Korea/W482/2015            | 2.3.4.4        | 1  | 3  | 1  | 6  | 1    | 3    | 2  | 1    | 1    |
| A/baikal_tea/Korea/1441/2014             | 2.3.4.4        | 1  | 3  | 1  | 6  | 1    | 3    | 2  | 2    | 1    |
| A/Canada_goose/Oregon/AH0012452/2015     | 2.3.4.4        | 1  | 3  | 1  | 6  | 1    | 4    | 1  | 1    | 1    |
| A/bean_goose/Korea/H53/2014              | 2.3.4.4        | 1  | 3  | 1  | 6  | 1    | 4    | 2  | 1    | 1    |
| A/broiler_duck/Korea/Buan2/2014          | 2.3.4.4        | 1  | 3  | 1  | 6  | 1    | 4    | 2  | 2    | 1    |
| A/American_wigeon/California/UCD58P/2015 | 2.3.4.4        | 1  | 3  | 1  | 6  | 1    | 4    | 3  | 1    | 1    |
| A/Anser_cygnoides/Hubei/FW44/2016        | 2.3.4.4        | 2  | 1  | 3  | 1  | 2    | 6    | 3  | 1    | 2    |
| A/swan/Voronezh/2/2017                   | 2.3.4.4        | 2  | 1  | 3  | 1  | NA   | 5    | 3  | 1    | 2    |
| A/duck/Jiangsu/k1203/2010                | 2.3.4.4        | 2  | 2  | 1  | NA | 2    | 7    | NA | 1    | NA   |
| A/goose/Eastern_China/S0408/2014         | 2.3.4.4        | 2  | 2  | 2  | 1  | 2    | 1    | 2  | 1    | 2    |
| A/goose/Guangdong/s13124/2013            | 2.3.4.4        | 2  | 2  | 2  | 1  | 2    | 7    | 2  | 1    | 1    |
| A/duck/Eastern_China/S1210/2013          | 2.3.4.4        | 2  | 2  | 2  | 3  | 2    | 1    | 1  | 1    | 2    |
| A/goose/Eastern_China/CZ/2013            | 2.3.4.4        | 2  | 2  | 2  | 3  | 2    | 1    | 2  | 1    | 2    |
| A/goose/Zhejiang/925037/2014             | 2.3.4.4        | 2  | 2  | 2  | 3  | 2    | 2    | 1  | 1    | 2    |
| A/duck/Eastern_China/S1109/2014          | 2.3.4.4        | 2  | 2  | 2  | 3  | 2    | 6    | 1  | 1    | 2    |
| A/duck/Zhejiang/6D18/2013                | 2.3.4.4        | 2  | 2  | 2  | 3  | 2    | 6    | 2  | 1    | 2    |
| A/duck/Eastern_China/L0405/2010          | 2.3.4.4        | 2  | 2  | 2  | 3  | 2    | 7    | 2  | 1    | 1    |
| A/breeder_duck/Korea/Gochang1/2014       | 2.3.4.4        | 2  | 2  | 2  | 3  | NA   | 1    | 2  | 1    | 2    |
| A/Von_Schrencks_bittern/Jiangxi/Y9/2014  | 2.3.4.4        | 2  | 2  | NA | 3  | 2    | 1    | 2  | 1    | 2    |
| A/duck/Eastern_China/L0423/2011          | 2.3.4.4        | 2  | 2  | NA | 3  | 2    | 7    | 2  | 1    | 1    |
| A/Baikal_tea/Korea/H52/2014              | 2.3.4.4        | 2  | NA | 2  | 3  | 2    | 1    | 2  | 1    | 2    |
| A/mallard/Maryland/07OS864/2007          | Am_non<br>GsGD | 3  | 1  | 3  | 2  | 1    | 2    | 1  | 1    | 2    |
| A/quail/California/K1400794/2014         | Am_non<br>GsGD | 3  | 1  | 3  | 2  | 2    | 2    | 1  | 1    | 2    |
| A/ruddy_turnstone/New_Jersey/828227/2001 | Am_non<br>GsGD | 3  | 1  | 3  | 2  | 2    | 2    | 3  | 1    | 2    |
| A/avian/Colorado/456648/2006             | Am_non         | 3  | 1  | 3  | 2  | 3    | 7    | 3  | 1    | 2    |

|                                 |                |   |   |   |    |   |   |   |   |   |
|---------------------------------|----------------|---|---|---|----|---|---|---|---|---|
|                                 | GsGD           |   |   |   |    |   |   |   |   |   |
| A/duck/Quang_Ninh/19c511/2013   | 2.3.2.1c       | 3 | 1 | 3 | 2  | 3 | 7 | 3 | 1 | 2 |
| A/turkey/Ireland/1378/1983      | Am_non<br>GsGD | 3 | 1 | 3 | 5  | 2 | 2 | 1 | 1 | 2 |
| A/mallard/California/2559P/2011 | Am_non<br>GsGD | 3 | 1 | 3 | NA | 1 | 2 | 1 | 1 | 2 |

156

157 HA (hemagglutinin), NA (neuraminidase), M1 (matrix-1), M2 (matrix-1), NP (nucleoprotein),  
 158 NS1 (nonstructural-1), NS2 (nonstructural-2), PA (polymerase acidic), PB1 (polymerase  
 159 basic-1) PB2 (polymerase basic-2). The numbers represent the cluster numbers for each  
 160 of the different viral protein segments. NA indicates that there is no sequence data  
 161 available for this segment.

## 163 Discussion

164 From the summary statistics for the pairwise distances between the sequences it is clear  
165 that there is very little variation between the matrix 1 (M1), NP, polymerase acidic (PA),  
166 polymerase basic 1 (PB1) and polymerase basic 2 (PB2) proteins. These proteins are well  
167 conserved as they are not under the same degree of selection as the other proteins. The  
168 polymerase genes need to be conserved in order to form a functional polymerase together.  
169 The M1 and M2 proteins are on the same viral segment but evolve at different rates. This  
170 suggests that it is more appropriate to classify the virus at the protein rather than the viral  
171 segment level and to look at evolution on a gene by gene basis.

172

173 The biggest differences are in the non-structural proteins (NS), but these differences are  
174 very skewed and this indicates one or two clusters of sequences that are distant from the  
175 others. The NS1 protein is responsible for inhibiting cellular gene expression as it is an  
176 RNA binding protein [25,26]. The role of the NS2 protein is less clear but it is involved in  
177 regulating viral replication and it is also known as the nuclear export protein [27–29]. In all  
178 of these roles increased diversity of the non-structural proteins may play an important part  
179 in viral evolution.

180

181 The HA and NA proteins exhibit very similar amounts of variation along with the M2 protein  
182 which forms the ion selective proton channel. The glycoproteins HA and NA are well  
183 known for their variability through antigenic drift and antigenic shift [30]. The M2 protein is  
184 the target for amantadine and rimantadine based anti influenza drugs and this might  
185 explain its higher level of variation compared to the M1 protein.

186

187 The number of clusters for the K-means clustering of the protein sequences was  
188 determined from the graph of the within group sum of the squares (WGSS) against the  
189 number of clusters (figures 1-3). The WGSS is initially high when there is only a single  
190 cluster as this reflects the total diversity of the sequences, it then falls sharply as the  
191 number of clusters increases as the diversity within clusters falls. Once it reaches a  
192 minimum then increasing the number of clusters does not reduce the diversity within the  
193 clusters and you are then over-fitting the data.

194

195 It is important in looking at the graphs of the WGSS to look at the scale of the y-axis. For  
196 the HA and NA proteins the WGSS ranges between 0 and 40 (figures 1 and 2). However,

197 for the NP protein the WGSS is between 0 and 0.8 which is over an order and nearly two  
198 orders of magnitude less. This very small WGSS in the case of the NP protein reflects the  
199 small average pairwise differences between sequences for this segment and shows that  
200 there is very little diversity. This indicates that the NP protein contains only a single cluster.  
201 The number of clusters for the other proteins is summarized in table 3 and the graphs of  
202 WGSS for each protein are given in supplementary figures S11-S17.

203

204 Given the number of clusters for each protein there are 40824 possible genotype  
205 combinations, but only 31 unique genotypes are observed. This is not surprising because  
206 of the temporal and geographical limits on the possible reassortments. Of these genotypes  
207 24 are within the 2.3.4.4 Guangdong H5 clade and the other 7 are either in the American  
208 non-Guangdong (Am\_nonGsGD, or 2.3.1.2c Guangdong clades.

209

210 The clustering of the H5 HA protein identified 3 different clusters. These correspond to the  
211 non-2.3.4.4 (cluster 3) sequences and two clusters within the 2.3.4.4 clade. This sub-  
212 division of the 2.3.4.4 clade has been reported previously in the studies of the 2014 South  
213 Korean outbreak where the HA sequences were divided into the A (Buan) and B Gochang  
214 lineages [17,18]. These correspond to cluster 1 (A/Buan) and cluster 2 (B/Gochang) in the  
215 current study. There are 9 Buan genotypes and 15 Gochang genotypes.

216

217 The presence of a single cluster for the HA sequences containing non-Guangdong H5  
218 sequences as well as Guangdong sequences coupled with the division of the 2.3.4.4.  
219 clades into two distinct clusters shows that there is more variability within the Guangdong  
220 2.3.4.4 clade than there is between Guangdong and non-Guangdong sequences. This  
221 suggests that the nomenclature for H5 HA needs to be revisited in order to take the non-  
222 Guangdong sequences into account.

223

224 The first outbreak of H5N8 was in a goose Ireland in 1983 is found in cluster 3 of the HA  
225 clusters. This is the only genotype containing the cluster 5 lineage of the N8  
226 neuraminidase, which indicates that reassortment occurred shortly after the origin of the  
227 H5N8 subtype. This cluster contains seven different genotypes, most of which are  
228 represented by single sequences, or sequences from a single location and year. This  
229 agrees with previous work based on the HA and NA phylogenetic trees that showed that in  
230 North America H5N8 occurs sporadically and is formed by the reassortment of an H5 and  
231 N8 containing subtype, but that it often does not persist [31,32].

232

233 This H5 cluster 3 group also contains the cluster 1 and cluster 3 M1 and M2 lineages,  
234 which are also present in two recent genotypes from within the Gochang sub-clade in  
235 China/Russia. The Quang Ninh genotype is identical to the avian Colorado 2006 genotype  
236 except that it contains a 2.3.1.2c H5 and not an Am\_nonGsGD hemagglutinin. This  
237 evidence suggests that there is extensive long-range movement of avian influenza within  
238 the wild bird population.

239

240 Almost all of the Buan genotypes contain the 1.3.1.6.1 pattern for the HA, M1, M2, NA and  
241 NS1 genes. There was a significant reassortment of the virus from the Buan group during  
242 the 2015 Taiwanese out-break where there are different lineages for the N8 neuraminidase  
243 and NS1 proteins [33,34]. All of the other genotype variations are in the NS2 and  
244 polymerase genes. These show that new lineages of these internal genes were  
245 incorporated as H5N8 migrated to North America, but this only formed a single new  
246 lineage. The continuing circulation of the H5 2.3.4.4 sub-clade in North America has been  
247 disputed [35,36]. Based on the evidence of the current study there has not been a  
248 widespread diversification of the H5N8 H5 2.3.4.4 containing genotypes.

249

250 There is much more diversity in the Gochang genotypes than in the Buan genotypes. This  
251 clade actually originated in Eastern China in 2010 and there were 7 Chinese genotypes  
252 before the Gochang genotype evolved during the 2014 South Korean outbreak. There  
253 have only been two post 2014 novel Gochang cluster genotypes, one in Russia and the  
254 second in China, both of these contain the M protein variants from the original Irish  
255 genotypes. The pattern of reassortment for the NS1, NS2 and polymerase proteins is more  
256 complex than expected. The NS2 protein is particularly variable and forms 7 different  
257 clusters. The polymerase proteins can be classified into fewer clusters but they combine  
258 together in different ways more often than the other proteins.

259

260 This study has shown that clades 2.3.4.4.A and 2.3.4.4.B containing variants of the H5N8  
261 subtype have been isolated from wild birds and that these have spread to the domestic  
262 flocks. A large number of the genotypes identified in the paper originated in wild migratory  
263 birds, such as teal, widgeon, swans and geese. None of the genotypes were originally  
264 isolated in chickens and only the original outbreak in Ireland in 1984 can be  
265 unambiguously assigned to domestic poultry (turkey). Where ducks are the host it is  
266 difficult to distinguish between birds that are farmed and those that are wild.

267

## 269 Supplementary Materials

270 Script S1: The R-script for the analysis of the HA sequences, Script S2: The R-script for  
271 the analysis of the M1 sequences, Script S3: The R-script for the analysis of the M2  
272 sequences, Script S4: The R-script for the analysis of the NA sequences, Script S5: The  
273 R-script for the analysis of the NP sequences, Script S6: The R-script for the analysis of  
274 the NS1 sequences, Script S7: The R-script for the analysis of the NS2 sequences, Script  
275 S8: The R-script for the analysis of the PA sequences, Script S9: The R-script for the  
276 analysis of the PB1 sequences, Script S10: The R-script for the analysis of the PB2  
277 sequences .

278 Figure S11: The within group sum of the squares for the Matrix 1 protein, Figure S12: The  
279 within group sum of the squares for the Matrix 2 protein, Figure S13: The within group sum  
280 of the squares for the Non-Structural 1 protein, Figure S14: The within group sum of the  
281 squares for the Non-Structural 2 protein, Figure S15: The within group sum of the squares  
282 for the polymerase A protein, Figures S16: The within group sum of the squares for the  
283 polymerase B1 protein, Figure S17: The within group sum of the squares for the  
284 polymerase B2 protein.

285

286

287 **Author Contributions:** Conceptualization, A.D. and M.I.; methodology, A.D.; software,  
288 A.D.; validation, A.D., L.T. and M.I.; resources, A.D.; data curation, A.D.; writing—original  
289 draft preparation, A.D.; writing—review and editing, A.D., L.T. and M.I.; visualization, A.D.

290 **Funding:** This research received no external funding.

291 **Acknowledgments:** None.

292 **Conflicts of Interest:** The authors declare no conflict of interest.

293

## 295 **References**

- 296 1. Verhagen JH, Herfst S, Fouchier RA. How a virus travels the world. *Science*. 2015;347: 616–617.
- 297 2. Xu X, Subbarao K, Cox NJ, Guo Y. Genetic characterization of the pathogenic influenza A/Goose/Guangdong/1/96  
298 (H5N1) virus: similarity of its hemagglutinin gene to those of H5N1 viruses from the 1997 outbreaks in Hong Kong.  
299 *Virology*. 1999;261: 15–19.
- 300 3. WHO O. Toward a unified nomenclature system for highly pathogenic avian influenza virus (H5N1). *Emerging*  
301 *infectious diseases*. 2008;14: e1.
- 302 4. Smith GJ, Donis RO, Health/Food WHOO for A, Group AO (WHO/OIE/FAO) HEW. Nomenclature updates resulting  
303 from the evolution of avian influenza A (H5) virus clades 2.1. 3.2 a, 2.2. 1, and 2.3. 4 during 2013–2014. *Influenza*  
304 *and other respiratory viruses*. 2015;9: 271–276.
- 305 5. Duan L, Bahl J, Smith GJD, Wang J, Vijaykrishna D, Zhang LJ, et al. The development and genetic diversity of H5N1  
306 influenza virus in China, 1996–2006. *Virology*. 2008;380: 243–254.
- 307 6. Vijaykrishna D, Bahl J, Riley S, Duan L, Zhang JX, Chen H, et al. Evolutionary dynamics and emergence of panzootic  
308 H5N1 influenza viruses. *PLoS pathogens*. 2008;4: e1000161.
- 309 7. Poen MJ, Bestebroer TM, Vuong O, Scheuer RD, van der Jeugd HP, Kleyheeg E, et al. Local amplification of highly  
310 pathogenic avian influenza H5N8 viruses in wild birds in the Netherlands, 2016 to 2017. *Eurosurveillance*.  
311 2018;23.
- 312 8. Ip HS, Torchetti MK, Crespo R, Kohrs P, DeBruyn P, Mansfield KG, et al. Novel Eurasian highly pathogenic avian  
313 influenza A H5 viruses in wild birds, Washington, USA, 2014. *Emerging infectious diseases*. 2015;21: 886.
- 314 9. Dalby AR, Iqbal M. The European and Japanese outbreaks of H5N8 derive from a single source population  
315 providing evidence for the dispersal along the long distance bird migratory flyways. *PeerJ*. 2015;3: e934.
- 316 10. Lee D-H, Torchetti MK, Winker K, Ip HS, Song C-S, Swayne DE. Intercontinental spread of Asian-origin H5N8 to  
317 North America through Beringia by migratory birds. *Journal of virology*. 2015;89: 6521–6524.
- 318 11. Lycett SJ, Bodewes R, Pohlmann A, Banks J, Bányai K, Boni MF, et al. Role for migratory wild birds in the global  
319 spread of avian influenza H5N8. 2016;
- 320 12. Bui CM, Gardner L, MacIntyre CR. Highly pathogenic avian influenza virus, Midwestern United States. *Emerging*  
321 *infectious diseases*. 2016;22: 138.
- 322 13. Lee D-H, Bahl J, Torchetti MK, Killian ML, Ip HS, DeLiberto TJ, et al. Highly pathogenic avian influenza viruses and  
323 generation of novel reassortants, United States, 2014–2015. *Emerging infectious diseases*. 2016;22: 1283.



- 324 14. Beerens N, Heutink R, Bergervoet SA, Harders F, Bossers A, Koch G. Multiple reassorted viruses as cause of highly  
325 pathogenic avian influenza A (H5N8) virus epidemic, the Netherlands, 2016. *Emerging infectious diseases*.  
326 2017;23: 1974.
- 327 15. Pohlmann A, Starick E, Grund C, Höper D, Strebelow G, Globig A, et al. Swarm incursions of reassortants of highly  
328 pathogenic avian influenza virus strains H5N8 and H5N5, clade 2.3. 4.4 b, Germany, winter 2016/17. *Scientific*  
329 *reports*. 2018;8: 15.
- 330 16. Guinat C, Nicolas G, Vergne T, Bronner A, Durand B, Courcoul A, et al. Spatio-temporal patterns of highly  
331 pathogenic avian influenza virus subtype H5N8 spread, France, 2016 to 2017. *Eurosurveillance*. 2018;23:  
332 1700791.
- 333 17. Jeong J, Kang H-M, Lee E-K, Song B-M, Kwon Y-K, Kim H-R, et al. Highly pathogenic avian influenza virus (H5N8) in  
334 domestic poultry and its relationship with migratory birds in South Korea during 2014. *Veterinary microbiology*.  
335 2014;173: 249–257.
- 336 18. Lee Y-J, Kang H-M, Lee E-K, Song B-M, Jeong J, Kwon Y-K, et al. Novel reassortant influenza A (H5N8) viruses,  
337 South Korea, 2014. *Emerging infectious diseases*. 2014;20: 1087.
- 338 19. Salemi M, Vandamme A-M, Lemey P. *The phylogenetic handbook: a practical approach to phylogenetic analysis*  
339 *and hypothesis testing*. Cambridge University Press; 2009.
- 340 20. Rousseeuw PJ, Kaufman L. Finding groups in data. *Series in Probability & Mathematical Statistics* 1990; 34 (1).  
341 1990; 111–112.
- 342 21. Squires RB, Noronha J, Hunt V, García-Sastre A, Macken C, Baumgarth N, et al. Influenza research database: an  
343 integrated bioinformatics resource for influenza research and surveillance. *Influenza and other respiratory*  
344 *viruses*. 2012;6: 404–416.
- 345 22. Kumar S, Stecher G, Tamura K. MEGA7: molecular evolutionary genetics analysis version 7.0 for bigger datasets.  
346 *Molecular biology and evolution*. 2016;33: 1870–1874.
- 347 23. Edgar RC. MUSCLE: a multiple sequence alignment method with reduced time and space complexity. *BMC*  
348 *bioinformatics*. 2004;5: 113.
- 349 24. Statistical Package R. R: A language and environment for statistical computing. Vienna, Austria: R Foundation for  
350 Statistical Computing. 2009;
- 351 25. Hale BG, Randall RE, Ortín J, Jackson D. The multifunctional NS1 protein of influenza A viruses. *Journal of general*  
352 *virology*. 2008;89: 2359–2376.
- 353 26. Min J-Y, Krug RM. The primary function of RNA binding by the influenza A virus NS1 protein in infected cells:  
354 Inhibiting the 2'-5' oligo (A) synthetase/RNase L pathway. *Proceedings of the National Academy of Sciences*.  
355 2006;103: 7100–7105.

- 356 27. O'Neill RE, Talon J, Palese P. The influenza virus NEP (NS2 protein) mediates the nuclear export of viral  
357 ribonucleoproteins. *The EMBO journal*. 1998;17: 288–296.
- 358 28. Neumann G, Hughes MT, Kawaoka Y. Influenza A virus NS2 protein mediates vRNP nuclear export through NES-  
359 independent interaction with hCRM1. *The EMBO journal*. 2000;19: 6751–6758.
- 360 29. Robb NC, Smith M, Vreede FT, Fodor E. NS2/NEP protein regulates transcription and replication of the influenza  
361 virus RNA genome. *Journal of general virology*. 2009;90: 1398–1407.
- 362 30. Bouvier NM, Palese P. The biology of influenza viruses. *Vaccine*. 2008;26: D49–D53.
- 363 31. Dalby AR. Complete analysis of the H5 hemagglutinin and N8 neuraminidase phylogenetic trees reveals that the  
364 H5N8 subtype has been produced by multiple reassortment events. *F1000Research*. 2016;5: 2463.
- 365 32. Dalby A. From sporadic to global: The changing face of H5N8. *PeerJ PrePrints*. 2015;3: e1489v1.
- 366 33. Huang P-Y, Lee C-CD, Yip C-H, Cheung C-L, Yu G, Lam TT-Y, et al. Genetic characterization of highly pathogenic H5  
367 influenza viruses from poultry in Taiwan, 2015. *Infection, Genetics and Evolution*. 2016;38: 96–100.
- 368 34. Lee M-S, Chen L-H, Chen Y-P, Liu Y-P, Li W-C, Lin Y-L, et al. Highly pathogenic avian influenza viruses H5N2, H5N3,  
369 and H5N8 in Taiwan in 2015. *Veterinary microbiology*. 2016;187: 50–57.
- 370 35. Krauss S, Stallknecht DE, Slemons RD, Bowman AS, Poulson RL, Nolting JM, et al. The enigma of the apparent  
371 disappearance of Eurasian highly pathogenic H5 clade 2.3. 4.4 influenza A viruses in North American waterfowl.  
372 *Proceedings of the National Academy of Sciences*. 2016;113: 9033–9038.
- 373 36. Ramey AM, Spackman E, Kim-Torchetti M, DeLiberto TJ. Weak support for disappearance and restricted  
374 emergence/persistence of highly pathogenic influenza A in North American waterfowl. 2016;
- 375
